# Supplementary material
Source: Springer Nature journal article supplement (https://www.springermedizin.de/resource/supplementary/12985_2009_553_MOESM4_ESM.pdf/9608436)

A.

H183F GDFNDYEELKH...NTNQEDLLVLWGI FHHPNDAAEQTKLYQNP...ATRSKVNGQSG  
 E190D GDFNDYEELKH...NTNQEDLLVLWGI HHPNDAADQTKLYQNP...ATRSKVNGQSG  
 L194A GDFNDYEELKH...NTNQEDLLVLWGI HHPNDAAEQTKAYQNP...ATRSKVNGQSG  
 Q226L GDFNDYEELKH...NTNQEDLLVLWGI HHPNDAAEQTKLYQNP...ATRSKVNGLSG  
 G228S GDFNDYEELKH...NTNQEDLLVLWGI HHPNDAAEQTKLYQNP...ATRSKVNGQSS  
 Q226L / G228S GDFNDYEELKH...NTNQEDLLVLWGI HHPNDAAEQTKLYQNP...ATRSKVNGLSS

B.

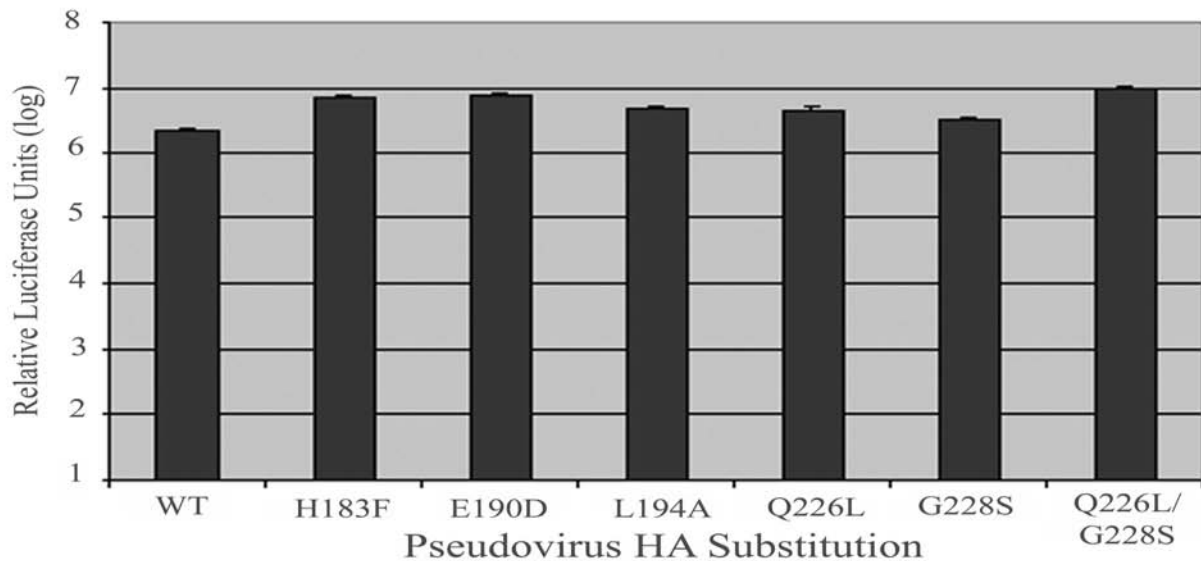

Supplement: MOESM4 [file 9608436]
